# Supplementary material
Source: ML conference proceedings conference paper supplement (https://openreview.net/forum?id=CpXiqz6qf4)
Supplement: supplementary_material [file attachment]

# Supplementary Material: SonicSense: Object Perception from In-Hand Acoustic Vibration

Anonymous Author(s)

Affiliation

Address

email

## 1 A. Hardware Configuration of Acoustic Robot Hand

2 Our hardware is built by 3D printing with Polylactic Acid (PLA) filament. We use the LX-224  
3 servo motor to actuate the finger which provides 20kg-cm torque and accurate position and voltage  
4 feedback. The contact microphones we used are commercially available on Amazon and the two  
5 counter weights on each fingertip is 40g. We place the controller of the motors as well as the audio  
6 jack inside the palm. The cost split of building our acoustic robot hand is shown in Tab. 1.

| Part                               | Amount | Price in total (\$) |
|------------------------------------|--------|---------------------|
| Lx224 motor                        | 4      | 75.96               |
| TTL/USB Debugging Board            | 1      | 12.99               |
| 4pcs piezo contact microphone      | 1      | 28.58               |
| Audio cable                        | 4      | 59.96               |
| Counterweight                      | 8      | 27.44               |
| PLA 3D printing material (689.11g) | 1      | 10.33               |
| Total:                             |        | 215.26              |

Table 1: Cost of the acoustic robot hand.

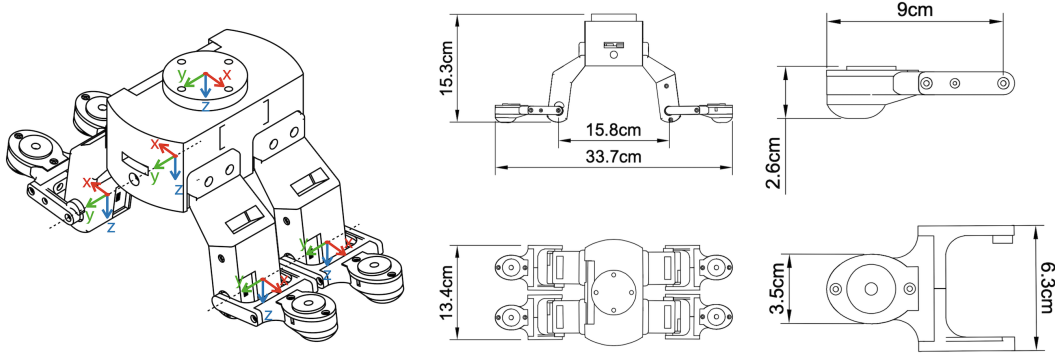

Figure 1: CAD model and coordinate system of the robot hand.

## 7 Contact Position Calculation

8 We will introduce the calculation of the approximated contact point location in this section. We  
9 set the fingertip position at the center of the fingerprint. Once the binary contact event is detected,  
10 we will record the angle of each finger joint. Based on our CAD model, we can also obtain other  
11 kinematic parameters of the hand such as the length of each link. Fig. 1 shows the sketch of our  
12 hardware design and its coordinate system. We use the center of the palm as the origin of the hand.  
13 The y-axis is parallel to the four finger joints and the z-axis is perpendicular to the palm, facing  
14 towards the finger. The coordinate system of the finger joints has the same orientation as the above  
15 central coordinate system of the hand. The center of the finger joint coordinate is located at the

center of each motor. We denote the position of joint 1 as  $p_1 = \begin{bmatrix} x_1 \\ y_1 \\ z_1 \end{bmatrix}$ , where  $x_1 = 7.845cm$ ,  $y_1 = 3.429cm$ ,  $z_1 = 13.691cm$ . Considering that the four fingers are symmetrical, the positions of the rest of the fingers can be represented as

$$p_2 = \begin{bmatrix} x_1 \\ -y_1 \\ z_1 \end{bmatrix}, p_3 = \begin{bmatrix} -x_1 \\ y_1 \\ z_1 \end{bmatrix}, p_4 = \begin{bmatrix} -x_1 \\ -y_1 \\ z_1 \end{bmatrix} \quad (1)$$

We use  $Pe_i$  to represent the fingertip position under its joint coordinate. Since the length between the origin of joint coordinate and the fingertip is  $l = 7.6cm$ , the fingertip position of finger  $i$  under the robot hand coordinate, denoted as  ${}^H Pe_i$ , can be calculated by

$${}^H Pe_i = p_i + RPe_i \quad (2)$$

Here,  $Pe_i = \begin{bmatrix} l \\ 0 \\ 0 \end{bmatrix}$ . For finger 1 and finger 2,  $R$  can be represented as:

$$R = R_y(-\theta_i + 4.5^\circ) \quad (3)$$

The  $\theta_i$  here represents the joint angle of finger  $i$ . For finger 3 and finger 4,  $R$  can be represented as:

$$R = R_y(\theta_i - 4.5^\circ)R_z(180^\circ) \quad (4)$$

We attach the robot palm on the end effector of the Franka Emika Panda arm and align the end effector coordinate with the robot hand coordinate to ensure  ${}^H Pe_i = {}^E Pe_i$ . Having the transformation matrix of the end effector coordinate to the robot arm  ${}^R E T$ , we can then calculate the contact position under the robot arm coordinate, represented as  ${}^R Pe_i$ , by:

$${}^R Pe_i = {}^R E T {}^E Pe_i \quad (5)$$

## B. Interaction Policy for Data Collection

We will introduce the interaction policy for the robot to conduct real-world data collection in this section. Since vision is not used, the dimension of the object is unknown. Therefore, the first challenge of the interaction policy is to estimate the dimension of the object.

We fix the object at the center of a black base on top of a wooden board as shown in Fig. 2A. The robot will first perform two tapping motions from the side with two different heights (Fig. 2B and 2C) and save the valid contact points. The tapping motion is able to make contact with objects since the objects' body is across the centerline of the black base. Based on the highest detected contact point location, the robot will have a rough estimation of the height of the object.

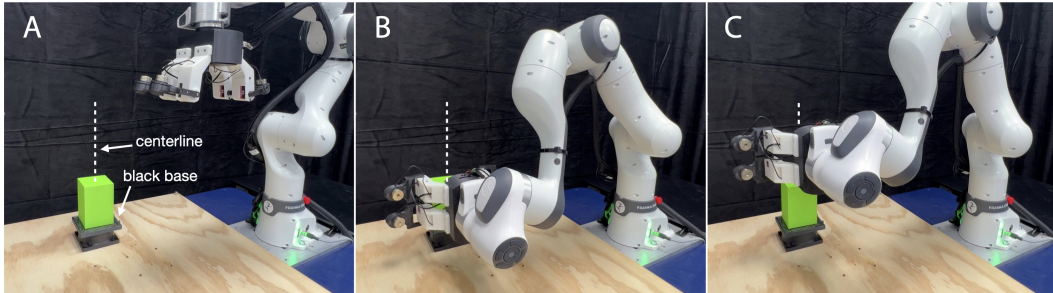

Figure 2: **Initial estimation stage of the interaction policy.** (A)The black base and its centerline. (B)The first side tapping in a lower position. (C)The second side tapping in a higher position.

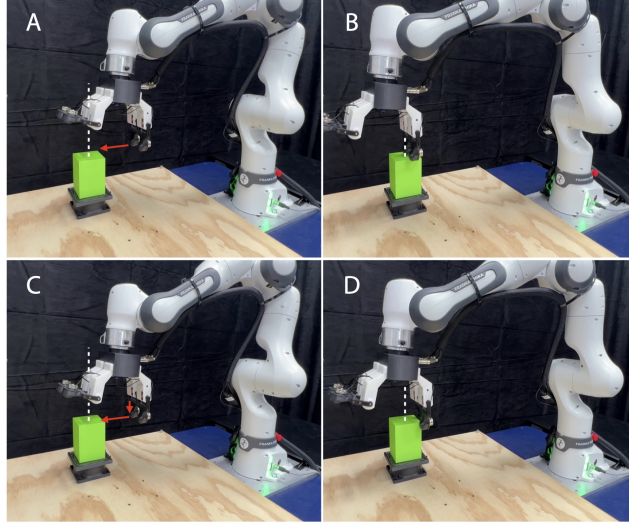

Figure 3: **Exploration of highest edge.** (A) The third finger gets to a position higher than the roughly estimated height and moves toward the centerline of the black base. (B) The third finger reaches the centerline and no contact happens. (C) The third finger goes back to the previous initial position as shown in (A), moves down a little bit, and moves toward the centerline again. (D) The third finger makes contact with the object. A contact event is detected and the contact position is saved.

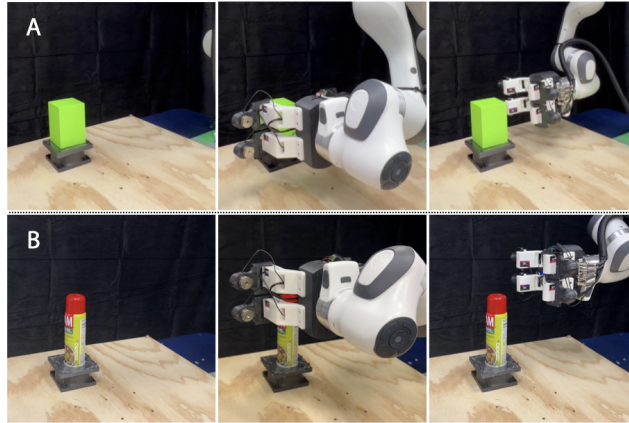

Figure 4: **Two scales of left side and back side tapping.** (A) The lower starting position of these two tapping motions on a smaller object. (B) The higher starting position of these two tapping motions on a larger object.

37 To obtain a more accurate estimation of height and radius of the object, the robot will reset to its  
 38 initial home position to lift its two fingers in front, and use its third finger to explore the highest  
 39 edge on top of the object. Specifically, starting from a suitable height away from the objects, the  
 40 third finger of the hand moves towards the centerline of the black base (Fig. 3A) and reaches another  
 41 side of the centerline (Fig. 3B). The robot keeps monitoring the acoustic signal from the third finger  
 42 during this process. Once a contact event is detected, the robot will record the contact position  
 43 through the kinematic model and stop exploring. If the third finger does not make contact with the  
 44 object and there is no contact event being detected, the robot hand will move back to the initial  
 45 position, and move down a little bit as shown in Fig. 3C and keep executing the same edge exploring  
 46 motion until a contact sound is detected as shown in Fig. 3D. We use the distance between the  
 47 contact point and the centerline as the estimated radius of the object and the distance between the  
 48 contact point and the black base plane as the final estimated height of the object.

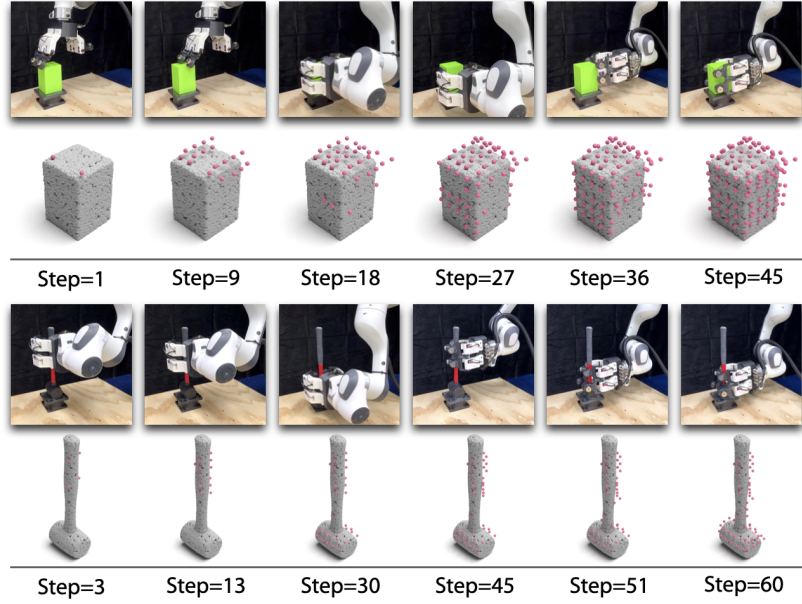

Figure 5: **Visualizations of contact events through tapping motion.** We show the sequence of tapping interactions on a smaller object in the first row and a larger object in the second row. The x-axis shows the step progression. The estimated contact fingertip positions are shown as points overlaid on top of the ground-truth 3D shapes.

49 Following the estimation, the robot will interact with the object through tapping motions on three  
50 sides of the object in sequences including the top side, the left side, and the backside of the object.  
51 During each tapping sequence, the robot hand will approach and tap the object step by step, ensuring  
52 continuous tapping while gradually transitioning from top to bottom (or left to right for top tapping)  
53 to cover the entire surface of the object. A detailed illustration of the tapping motion is provided in  
54 Fig. 5. The robot relies on the estimated radius to determine whether to collect tapping data on top  
55 of the object since the useful information is limited when the surface area on top of the object is too  
56 small. We set the radius threshold to be 2cm in this case. Additionally, depending on the estimated  
57 height of the objects, the robot decides to start from a higher position or a lower position for two  
58 different scales of data collection during the left-side tapping and back-side tapping as illustrated in  
59 Fig. 4. We set the height threshold to be 20cm. For a more comprehensive visual demonstration,  
60 please refer to our Supplementary Movies. When our robot hand taps objects, we can determine  
61 such contact events from the voltage feedback from the motor in each finger. We put a  $10\Omega$  resistor  
62 in series with the servo motor power. When the motor encounters external force, it receives an  
63 increase of current supply and, as a result, a decrease of voltage from the motor voltage sensor  
64 readings. Though we also experimented with detecting salient acoustic signals to detect the binary  
65 contact event, we found that the natural motor voltage feedback embedded by the motors provides  
66 more reliable and accurate signals. This is because the voltage feedback can reflect subtle resistance  
67 encountered by the robot finger, where acoustic vibrations from the contact microphone also include  
68 motor noises. After the contact event is detected, we can localize the contact points in 3D space with  
69 respect to the robot with the forward kinematics of our robot hand and arm.

70 We conducted this real-world data collection on the 83 real-world objects mentioned in our main  
71 texts and used the tapping data only with valid contact events for our material classification, shape  
72 reconstruction, and object re-recognition tasks. The tapping data are saved in txt file format, includ-  
73 ing position in the x-axis ( $x$ ), position in the y-axis ( $y$ ), position in the z-axis ( $z$ ), binary tapping  
74 detection from acoustic vibration signal ( $a$ ), binary tapping detection from voltage signal ( $v$ ), finger  
75 index ( $f$ ), and index of tapping ( $i$ ):

$$\{x, y, z, a, v, f, i\} \quad (6)$$



Each tapping data is also accompanied by a five-second audio recording, which is guaranteed to cover the acoustic signals of the impact sound. We will present the audio processing procedure in the next section.

## C. Acoustic Vibration Recording and Processing

To obtain more useful information, we first extracted the striking vibration signal from the 5-second recording. Typically, the anticipated tapping vibration signal exhibits a noticeable characteristic, often resembling a peak-shaped pattern. However, real-world acoustic vibration signals may contain random noises, so simply extracting the signal around maximum amplitude will not work. To extract informative acoustic vibration signals, we used a window of 1000 units of acoustic waveform to monitor the average absolute amplitude of the acoustic signals. If the average amplitude in the current window is larger than both the average amplitude in the previous window and the next window, 20000 units of the acoustic signals ( $20000/44100Hz = 0.45351474s = 453.5147ms$ ) will be extracted around the beginning timestamp of the current window. We applied the same extracting mechanism to the recording with no obvious striking signal, for example, foam objects. For those objects, most extracted signals are motor noises. However, we consider this as a feature of the soft materials perceived by our robot hand. Finally, we followed previous work to convert the raw audio signals to Mel spectrogram representations with a dimension of  $64 \times 64$  resolution. The length of the Fast Fourier transform (FFT) window is set to 2048 and the number of the Mel bands is set to 64. The highest frequency is restricted to 8192Hz. To ensure the correct dimension of the Mel spectrogram along the temporal dimension, the number of samples between consecutive frames is rounded to the nearest value obtained by dividing the total number of audio samples by 64.

## D. Implementation Details for Material Classification

### Dataset Construction

In this section, we explain how we obtained the material label for each of the contact positions around the object. During tapping data collection, we used two depth cameras to capture two point clouds of the object after fixing the object on the platform. We fuse those two point clouds and use the annotated point cloud model to align with the object. We then searched the nearest point of the annotated point cloud for each of the contact points and assigned the annotated material label to that contact point based on the label of the nearest point. The material label serves as the ground truth for training our material classification model.

Tapping data from 82 objects is used for the material classification task. We removed the acoustic data collected from a disinfecting wipe because the paper material is too soft and there is a thin plastic film attached to the paper, so the signal is too unique and out of distribution from all other paper materials. We conducted separate training on three different random splits of the dataset to evaluate our method. Note that our splits are based on objects to avoid strong overlapping between training, validation, and testing data. We have 60 objects for training, 11 objects for validation, and 11 objects for testing. We balanced the number of acoustic data in each of the material classes for training and validation by duplicating them from random choice. Therefore, due to different objects coming with different sizes and different numbers of tapping data, the number of data points for each split will be different under the same number of objects. The resulting number of data points in each split is shown in Tab. 2.

### Material Classification Model Architecture

We show the detailed architecture design of our material classification network in Tab. 3.

| Dataset splits | Training | Validation | Testing |
|----------------|----------|------------|---------|
| Split 1        | 8829     | 1521       | 948     |
| Split 2        | 7767     | 2142       | 1293    |
| Split 3        | 8433     | 1278       | 1195    |

Table 2: **Material classification data statistics.**

| Layer name                 | Input Channel | Output Channel | Kernal Size | Stride Size | Padding |
|----------------------------|---------------|----------------|-------------|-------------|---------|
| Conv1                      | 1             | 16             | 6           | 2           | 0       |
| Batch norm + Relu          | N/A           | N/A            | N/A         | N/A         | N/A     |
| Maxpool1                   | 16            | 16             | 2           | 2           | 0       |
| Conv2                      | 16            | 32             | 5           | 1           | 0       |
| Batch norm + Dropout+ Relu | N/A           | N/A            | N/A         | N/A         | N/A     |
| Maxpool2                   | 32            | 32             | 2           | 2           | 0       |
| Conv3                      | 32            | 150            | 5           | 1           | 0       |
| Batch norm + relu+dropout  | N/A           | N/A            | N/A         | N/A         | N/A     |
| Fc1                        | 150           | 70             | N/A         | N/A         | N/A     |
| Dropout                    | N/A           | N/A            | N/A         | N/A         | N/A     |
| Fc2                        | 70            | 9              | N/A         | N/A         | N/A     |

Table 3: **Neural network architecture of the material classification model.**

## Material Classification Hyperparameters and Results

We list all the hyperparameter selections and experimental results across different random data splits in Tab. 4. We select the model based on the best validation accuracy. Due to the testing dataset being unbalanced, we use the average F1 score as our evaluation metric. The confusion matrix of the first experiment is shown in Fig. 6.

|                                   | Split 1                                         | Split 2  | Split 3  |
|-----------------------------------|-------------------------------------------------|----------|----------|
| Max epoch                         | 300                                             | 300      | 300      |
| Learning rate                     | 0.00903                                         | 0.00935  | 0.00903  |
| Dropout                           | 0.52105                                         | 0.40947  | 0.30927  |
| Batch size                        | 36                                              | 32       | 32       |
| Optimizer                         | SGD                                             |          |          |
| LR schedule                       | Decays the Learning rate by 0.1 every 200 steps |          |          |
| Best train accuracy               | 0.9891                                          | 0.9876   | 0.9826   |
| Best validation accuracy          | 0.6141                                          | 0.5691   | 0.5696   |
| Refinement parameters (M,K,N)     | (8,3,25)                                        | (8,8,25) | (6,1,30) |
| Testing F1 score                  | 0.5711                                          | 0.5035   | 0.4939   |
| Testing F1 score after refinement | 0.8786                                          | 0.6924   | 0.718    |

Table 4: **Material classification hyperparameters and results on three random data splits.**

## E. Implementation Details for Shape Reconstruction

### Dataset Construction

We leverage the contact positions collected from the 83 objects for our shape reconstruction task. The tapping interaction results in highly sparse contact points. The maximum number of contact points is 300 for each object. We divided the dataset based on 15 shape categories(i.e., bottle, can cup, hammer, mug, wine glass, cube, cube(concave), cylinder, cylinder(concave), cone, quadrangular pyramid, triangular pyramid, prism, irregular) and split the dataset for training, validation, and testing according to these categories. To balance the training dataset for learning, we randomly duplicated the data up to 100 for each category. We then randomly sampled 80% to 90% points and augmented the dataset to 1500 for each shape to augment the training dataset.

To further boost the training dataset, we leveraged the PyBullet simulator to collect synthetic tapping points. We collected 629 synthetic 3D models under the same categories of real-world objects. In

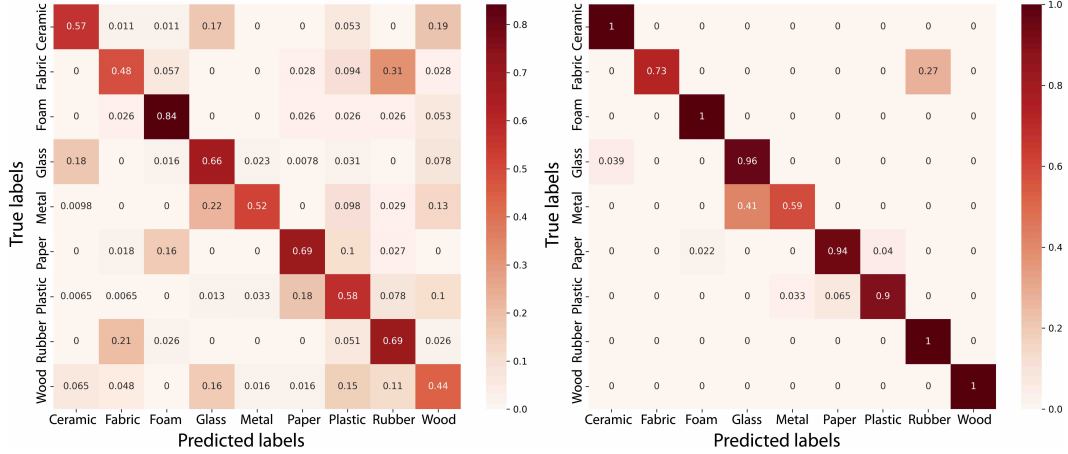

Figure 6: **Confusion matrix of material classification task on one testing dataset** The results of the initial prediction(left) and the results of the prediction after refinement(right).

the simulation, We implemented the same interaction policy and data augmentation techniques as in our real-world data construction. The ground truth model consists of a point cloud model comprising 5000 points for both the real-world objects and the synthetic objects. Our experiments include three different splits of data with different random seeds where both the validation objects and testing objects only include real-world objects. For real-world objects, we split them into 61, 11, and 11 objects for training, validation, and testing. In order to leverage the simulation data to improve our model on our real-world objects, initially, we use all the synthetic datasets to pre-train our model. Gradually, we blended in more real-world data and reduced the percentage of synthetic data in our training set. We show the blending schedule in Tab. 5.

| Epoch    | Synthetic dataset | Real dataset |
|----------|-------------------|--------------|
| 0-100    | 100%              | 0%           |
| 100-200  | 90%               | 10%          |
| 200-300  | 80%               | 20%          |
| 300-400  | 60%               | 40%          |
| 400-500  | 40%               | 60%          |
| 500-600  | 20%               | 80%          |
| 600-700  | 10%               | 90%          |
| 700-800  | 5%                | 95%          |
| 800-1000 | 0%                | 100%         |

Table 5: **The blending schedule of synthetic dataset and real dataset during shape reconstruction training.**

## Shape Reconstruction Model Architecture

We show the detailed architecture design of our shape reconstruction network in Tab. 6.

## Shape Reconstruction Hyperparameters and Results

We list all the hyperparameter selections and experimental results across different random data splits in Tab. 7.

## F. Implementation Details for Object Re-recognition

### Dataset Construction

We utilize both the tapping vibration signal and contact points from all 82 objects for our object re-recognition task. For each of the objects, we first randomly split 20% of the tapping data for testing,

| Layer name        | Input Channel | Output Channel | Kernal Size | Stride Size | Padding |
|-------------------|---------------|----------------|-------------|-------------|---------|
| Conv1d            | 3             | 128            | 1           | 1           | 0       |
| Batch norm + Relu | N/A           | N/A            | N/A         | N/A         | N/A     |
| Conv1d            | 128           | 256            | 1           | 1           | 0       |
| Conv1d            | 512           | 512            | 1           | 1           | 0       |
| Batch norm + Relu | N/A           | N/A            | N/A         | N/A         | N/A     |
| Conv1d            | 512           | 1024           | 1           | 1           | 0       |
| Fc1               | 1024          | 1024           | N/A         | N/A         | N/A     |
| Relu              | N/A           | N/A            | N/A         | N/A         | N/A     |
| Fc2               | 1024          | 1024           | N/A         | N/A         | N/A     |
| Relu              | N/A           | N/A            | N/A         | N/A         | N/A     |
| Fc3               | 1024          | 3×2000         | N/A         | N/A         | N/A     |

Table 6: Neural network architecture of the shape reconstruction model.

|                               | Split 1    | Split 2                                         | Split 3    |
|-------------------------------|------------|-------------------------------------------------|------------|
| Max epoch                     |            | 1000                                            |            |
| Learning rate                 |            | 0.000005                                        |            |
| Batch size                    |            | 500                                             |            |
| Optimizer                     |            | Adam                                            |            |
| LR schedule                   |            | Decays the Learning rate by 0.7 every 500 steps |            |
| Lowest validation loss(CD-L2) | 3.6634e-05 | 5.6421e-05                                      | 5.4612e-05 |
| Lowest testing loss(CD-L2)    | 6.7536e-05 | 5.6938e-05                                      | 6.0342e-05 |
| Lowest testing loss(CD-L1)    | 0.009184   | 0.0085316                                       | 0.0085615  |

Table 7: Shape reconstruction hyperparameters and results on three random data splits.

20% of the tapping data for validation, and 60 % of the tapping data for training. To augment the dataset, 15 tapping data are randomly sampled 500 times for each object in the training dataset, and 50 times for each object in the validation and testing dataset. Therefore, there are 410,000 data points for training, 4,100 data points for validation, and 4,100 data points for testing. As in the previous two tasks, we have three different random splits of the dataset for evaluation.

## Object Re-recognition Model Architecture

We show the detailed architecture design of our object re-recognition network in Tab. 8.

## Object Re-recognition Hyperparameters and Results

We list all the hyperparameter selections and experimental results across different random data splits in Tab. 9.

## G. Implementation Details for Resistance Test Against Ambient Noise

We placed a Saramonic LavMicro U1A air microphone next to the fourth finger. We utilized the National Institute for Occupational Safety and Health (NIOSH) Sound Level Meter App on an iPhone to monitor the noise level. This App has been shown to effectively capture accurate noise levels [1]. We stretched the finger so that we can place the iPhone microphone, the fingertip surface, and the air microphone in the same plane. We then set up a speaker facing toward the middle of the robot hand to play Gaussian white noise.

## H. Parameters of Acoustic Vibration Signal Processing in Characterization Experiments

We list all the parameters used to process the acoustic vibration signals for our sensing characterization experiments in Tab. 10. The parameters are used to convert the waveform representation into spectrogram representation as well as the twelve descriptor extraction methods. For liquid object



| Layer name                    | Input Channel | Output Channel | Kernal Size | Stride | Padding |
|-------------------------------|---------------|----------------|-------------|--------|---------|
| <b>Audio encoder:</b>         |               |                |             |        |         |
| Conv1                         | 15            | 16             | 6           | 2      | 0       |
| Batch norm + Relu             | N/A           | N/A            | N/A         | N/A    | N/A     |
| Maxpool1                      | 16            | 16             | 2           | 2      | 0       |
| Conv2                         | 16            | 32             | 5           | 1      | 0       |
| Batch norm + Dropout+ Relu    | N/A           | N/A            | N/A         | N/A    | N/A     |
| Maxpool2                      | 32            | 32             | 2           | 2      | 0       |
| Conv3                         | 32            | 150            | 5           | 1      | 0       |
| Batch norm + relu             | N/A           | N/A            | N/A         | N/A    | N/A     |
| <b>Contact point encoder:</b> |               |                |             |        |         |
| Conv1d                        | 3             | 64             | 1           | 1      | 0       |
| Batch norm + Relu             | N/A           | N/A            | N/A         | N/A    | N/A     |
| Conv1d                        | 64            | 64             | 1           | 1      | 0       |
| Conv1d                        | 128           | 128            | 1           | 1      | 0       |
| Batch norm + Relu             | N/A           | N/A            | N/A         | N/A    | N/A     |
| Conv1d                        | 128           | 150            | 1           | 1      | 0       |
| <b>MLP layers:</b>            |               |                |             |        |         |
| dropout                       | N/A           | N/A            | N/A         | N/A    | N/A     |
| fc1                           | 300           | 170            | N/A         | N/A    | N/A     |
| dropout                       | N/A           | N/A            | N/A         | N/A    | N/A     |
| fc2                           | 170           | 170            | N/A         | N/A    | N/A     |
| dropout                       | N/A           | N/A            | N/A         | N/A    | N/A     |
| fc3                           | 170           | 82             | N/A         | N/A    | N/A     |

Table 8: **Object re-recognition model**

|                               | Split 1    |          |          | Split 2    |          |          | Split 3    |          |          |
|-------------------------------|------------|----------|----------|------------|----------|----------|------------|----------|----------|
| Max epoch                     | 500        |          |          | 500        |          |          | 500        |          |          |
| Learning rate                 | 3.6515e-05 |          |          | 8.8224e-05 |          |          | 7.8910e-05 |          |          |
| Dropout                       | 0.2348     |          |          | 0.2240     |          |          | 0.3253     |          |          |
| Batch size                    | 200        |          |          | 200        |          |          | 400        |          |          |
| Results with different input: | <b>A+C</b> | <b>A</b> | <b>C</b> | <b>A+C</b> | <b>A</b> | <b>C</b> | <b>A+C</b> | <b>A</b> | <b>C</b> |
| Best validation accuracy      | 0.9707     | 0.8744   | 0.5295   | 0.9383     | 0.8756   | 0.5105   | 0.9200     | 0.8137   | 0.5456   |
| Best test accuracy            | 0.9241     | 0.8034   | 0.4599   | 0.9183     | 0.8281   | 0.5276   | 0.9332     | 0.8920   | 0.4793   |

Table 9: **Object re-recognition hyperparameters and results on three random data splits.** In the table, "A" refers to the acoustic vibration signal input modality, and "C" refers to the contact point location input modality.

experiments (i.e., shaking and pouring), the duration of the acoustic clip is long, so we chose a larger hop length. We have observed that there are no obvious acoustic signals above the frequency 8192 for this experiment, we chose the smaller highest frequency to show more details of the spectrograms. For rigid object experiments (i.e., dice shape and dice inventory), the duration of collision vibration is very short. To perceive more details of the collision signal, we chose a smaller hop length. Since the collision vibration signal of solid objects includes a higher frequency, we set the highest frequency to be larger.

## I. Quantitative Results in Characterization Experiments

We derived twelve interpretable signal descriptors to quantitatively measure the features of the acoustic vibration signals. These feature descriptors are key statistical summaries of certain aspects of the signals, which provide an interpretable understanding of the signal-capturing capabilities and sensitivity characterization of our robot hand. Specifically, we denote them as (1) D1: average root mean square of the signal, (2) D2: average spectral centroid, (3) D3: average bandwidth, (4) D4: average contrast, (5) D5: average flatness, (6) D6: average roll-off, (7) D7: average zero crossing

| parameters            | pouring   | shaking   | dice shape | dice inventory |
|-----------------------|-----------|-----------|------------|----------------|
| Length of FFT window  | 2048      | 2048      | 2048       | 2048           |
| Hop length            | 2048      | 1024      | 512        | 512            |
| Number of Mel band    | 64        | 64        | 64         | 64             |
| Highest frequency(Hz) | 8192      | 8192      | 16384      | 16384          |
| Color limits          | [-10,-80] | [-10,-80] | [-10,-80]  | [-10,-80]      |
| Duration s            | 13.00s    | 2.38s     | 3.89s      | 3.89s          |
| Poly features order   | 3         | 3         | 3          | 3              |
| Roll-off percentage   | 0.9       | 0.9       | 0.9        | 0.9            |

Table 10: **Parameters of acoustic vibration signal processing in characterization experiments.**

rate, (8) D8: average tempogram, (9) D9: average poly features, (10) D10: average MFCCs, (11) D11: average chroma, and (12) D12: average tonnetz.

We repeated 30 trials for each subtask in the container experiment. In each trial, we extracted the twelve descriptor features by averaging the feature of the acoustic signals from four fingers. We then rescaled all the descriptor values to the range between 0 and 1. With these feature descriptors, we performed unsupervised dimensionality reduction of the high-dimensional signals into 2D space to test whether we can distinguish between various events triggered by different object states. The quantitative results of the mean value and standard error of the mean (SEM) of the twelve acoustic vibration signal descriptors from the 30 trials are shown in Tab. 11.

|                    | D1          | D2           | D3           | D4           | D5          | D6          |
|--------------------|-------------|--------------|--------------|--------------|-------------|-------------|
| Dice(quantity:1)   | 0.093±0.010 | 0.249±0.013  | 0.514±0.032  | 0.464±0.036  | 0.182±0.013 | 0.430±0.023 |
| Dice(quantity:3)   | 0.590±0.011 | 0.825±0.016  | 0.827±0.019  | 0.3386±0.024 | 0.782±0.022 | 0.848±0.015 |
| Dice(quantity:5)   | 0.803±0.013 | 0.779±0.023  | 0.728±0.034  | 0.306±0.039  | 0.684±0.034 | 0.798±0.026 |
| Dice(6 edges)      | 0.106±0.009 | 0.839±0.020  | 0.886±0.009  | 0.482±0.027  | 0.613±0.022 | 0.823±0.016 |
| Dice(12 edges)     | 0.559±0.011 | 0.682±0.015  | 0.655±0.011  | 0.517±0.035  | 0.717±0.027 | 0.615±0.010 |
| Dice(30 edges)     | 0.802±0.014 | 0.415±0.027  | 0.299±0.023  | 0.695±0.029  | 0.469±0.036 | 0.388±0.024 |
| Pouring(1st 100ml) | 0.507±0.022 | 0.386±0.024  | 0.311±0.025  | 0.684±0.033  | 0.360±0.037 | 0.335±0.024 |
| Pouring(2nd 100ml) | 0.821±0.019 | 0.135±0.0137 | 0.154±0.015  | 0.796±0.018  | 0.326±0.033 | 0.114±0.010 |
| Pouring(3rd 100ml) | 0.751±0.016 | 0.163±0.0164 | 0.220±0.16   | 0.508±0.021  | 0.400±0.038 | 0.130±0.011 |
| Shaking(100ml)     | 0.032±0.004 | 0.825±0.020  | 0.853±0.011  | 0.573±0.052  | 0.597±0.033 | 0.919±0.011 |
| Shaking(200ml)     | 0.219±0.017 | 0.736±0.018  | 0.657±0.012  | 0.582±0.023  | 0.566±0.023 | 0.713±0.011 |
| Shaking(300ml)     | 0.480±0.039 | 0.318±0.031  | 0.297±0.026  | 0.565±0.029  | 0.231±0.026 | 0.302±0.027 |
|                    | D7          | D8           | D9           | D10          | D11         | D12         |
| Dice(quantity:1)   | 0.123±0.019 | 0.161±0.019  | 0.135±0.012  | 0.284±0.031  | 0.298±0.025 | 0.464±0.048 |
| Dice(quantity:3)   | 0.739±0.022 | 0.524±0.021  | 0.576±0.018  | 0.281±0.023  | 0.716±0.020 | 0.553±0.042 |
| Dice(quantity:5)   | 0.767±0.025 | 0.716±0.026  | 0.782±0.022  | 0.566±0.027  | 0.742±0.028 | 0.587±0.035 |
| Dice(6 edges)      | 0.524±0.036 | 0.576±0.031  | 0.062±0.006  | 0.188±0.018  | 0.435±0.033 | 0.743±0.027 |
| Dice(12 edges)     | 0.593±0.031 | 0.203±0.014  | 0.470±0.008  | 0.547±0.020  | 0.486±0.028 | 0.515±0.025 |
| Dice(30 edges)     | 0.490±0.038 | 0.319±0.019  | 0.820±0.014  | 0.860±0.016  | 0.694±0.024 | 0.359±0.028 |
| Pouring(1st 100ml) | 0.441±0.027 | 0.365±0.045  | 0.488±0.019  | 0.624±0.028  | 0.585±0.040 | 0.622±0.034 |
| Pouring(2nd 100ml) | 0.162±0.016 | 0.543±0.044  | 0.818±0.019  | 0.810±0.018  | 0.491±0.038 | 0.567±0.024 |
| Pouring(3rd 100ml) | 0.232±0.020 | 0.469±0.040  | 0.717±0.017  | 0.438.016    | 0.441±0.041 | 0.235±0.025 |
| Shaking(100ml)     | 0.630±0.031 | 0.911±0.013  | 0.0576±0.006 | 0.534±0.038  | 0.532±0.039 | 0.592±0.047 |
| Shaking(200ml)     | 0.706±0.031 | 0.260±0.013  | 0.236±0.011  | 0.642±0.011  | 0.678±0.032 | 0.345±0.032 |
| Shaking(300ml)     | 0.295±0.034 | 0.112±0.009  | 0.606±0.032  | 0.842±0.012  | 0.478±0.027 | 0.568±0.04  |

Table 11: **Quantitative results of the mean value and standard error of the mean (SEM) of the twelve acoustic vibration signal descriptors in characterization experiments.**

199 **References**

- 200 [1] E. Crossley, T. Biggs, P. Brown, and T. Singh. The accuracy of iphone applications to monitor  
201 environmental noise levels. *The Laryngoscope*, 131(1):E59–E62, 2021.
